# Supplementary material for: Turmeric‐Derived Nanoparticles Functionalized Aerogel Regulates Multicellular Networks to Promote Diabetic Wound Healing
Source: PubMed Central journal article supplement (PMC11095230; doi:10.1002/advs.202307630), 2024-03-05
Supplement: ADVS-11-2307630-s002.pdf [file ADVS-11-2307630-s002.pdf]

## Supporting Information

for *Adv. Sci.*, DOI 10.1002/adv.202307630

Turmeric-Derived Nanoparticles Functionalized Aerogel Regulates Multicellular Networks to Promote Diabetic Wound Healing

*Bodeng Wu, Weilun Pan, Shihua Luo, Xiangrong Luo, Yitao Zhao, Qi Xiu, Mingzhen Zhong, Zhenxun Wang, Tong Liao, Ningcen Li, Chunchen Liu, Chengtao Nie, Guanghui Yi, Shan Lin, MengChen Zou\*, Bo Li\* and Lei Zheng\**

## Supporting Information

**Turmeric-Derived Nanoparticles Functionalized Aerogel Regulates Multicellular Networks to Promote Diabetic Wound Healing**

*Bodeng Wu<sup>#</sup>, Weilun Pan<sup>#</sup>, Shihua Luo<sup>#</sup>, Xiangrong Luo, Yitao Zhao, Qi Xiu, Mingzhen Zhong, Zhenxun Wang, Tong Liao, Ningcen Li, Chunchen Liu, Chengtao Nie, Guanghui Yi, Shan Lin, MengChen Zou\*, Bo Li\*, and Lei Zheng\**

B. Wu, W. Pan, Q. Xiu, M. Zhong, Z. Wang, T. Liao, N. Li, C. Liu, C. Nie, G. Yi, S. Lin, B. Li, L. Zheng

Department of Laboratory Medicine, Nanfang Hospital, Southern Medical University  
Guangzhou 510515, China

S. Luo

Center for Clinical Laboratory Diagnosis and Research, Affiliated Hospital of Youjiang Medical University for Nationalities, Baise 533000, China

Key Laboratory of Research on Clinical Molecular Diagnosis for High Incidence Diseases in Western Guangxi of Guangxi Higher Education Institutions, Affiliated Hospital of Youjiang Medical University for Nationalities, Baise 533000, China

X. Luo, M. Zou

Department of Endocrinology and Metabolism, Nanfang Hospital, Southern Medical University, Guangzhou 510515, China

Y. Zhao

Department of Joint Surgery and Sports Medicine, The Third Affiliated Hospital of Southern Medical University, Guangzhou 510630, China

\*Correspondence

Email: [zoumc@smu.edu.cn](mailto:zoumc@smu.edu.cn); [nfyylibo2012@smu.edu.cn](mailto:nfyylibo2012@smu.edu.cn); [nfyzhenglei@smu.edu.cn](mailto:nfyzhenglei@smu.edu.cn)

<sup>#</sup>These authors contributed equally

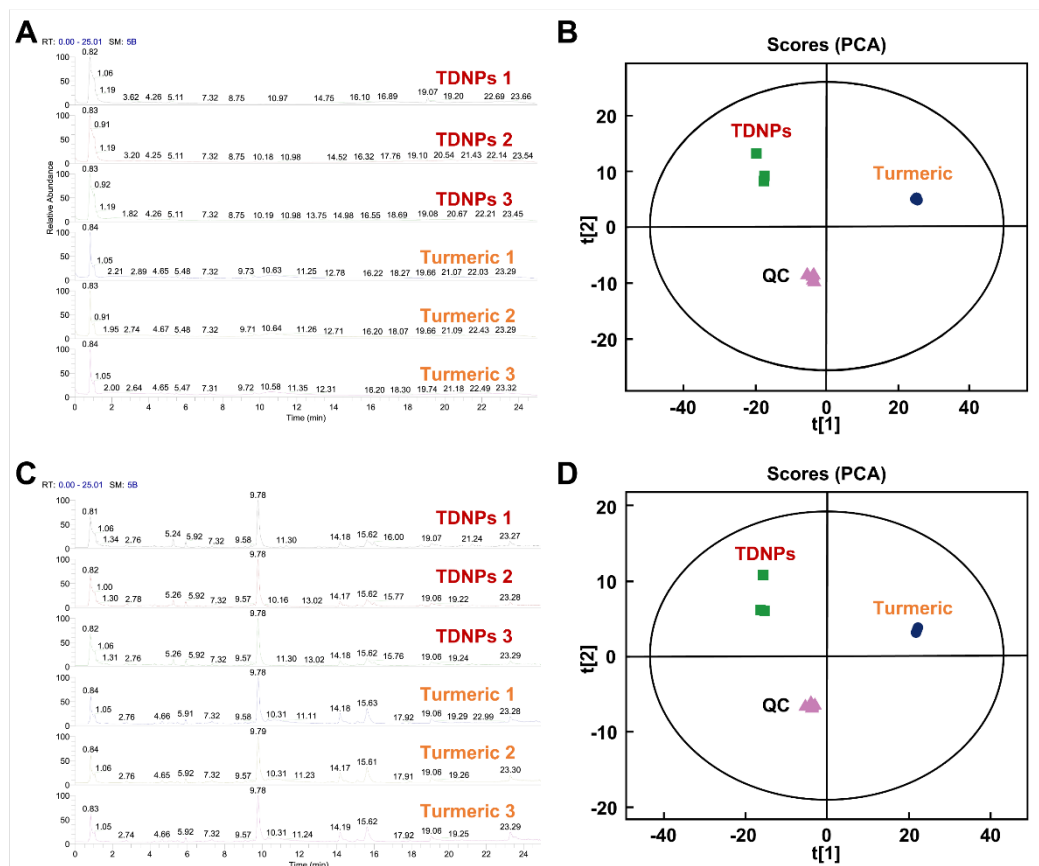

**Figure S1.** Total ion chromatograms (TICs) and principal component analysis (PCA) of turmeric-derived nanoparticles (TDNPs) and turmeric ( $n = 3$ ). (A) Spectrum of metabolomic negative electrospray ionization ( $-ESI$ ) modes. (B) PCA of the  $-ESI$  modes. (C) Spectrum of metabolomic positive electrospray ionization ( $+ESI$ ) modes. (D) PCA of the  $+ESI$  modes.

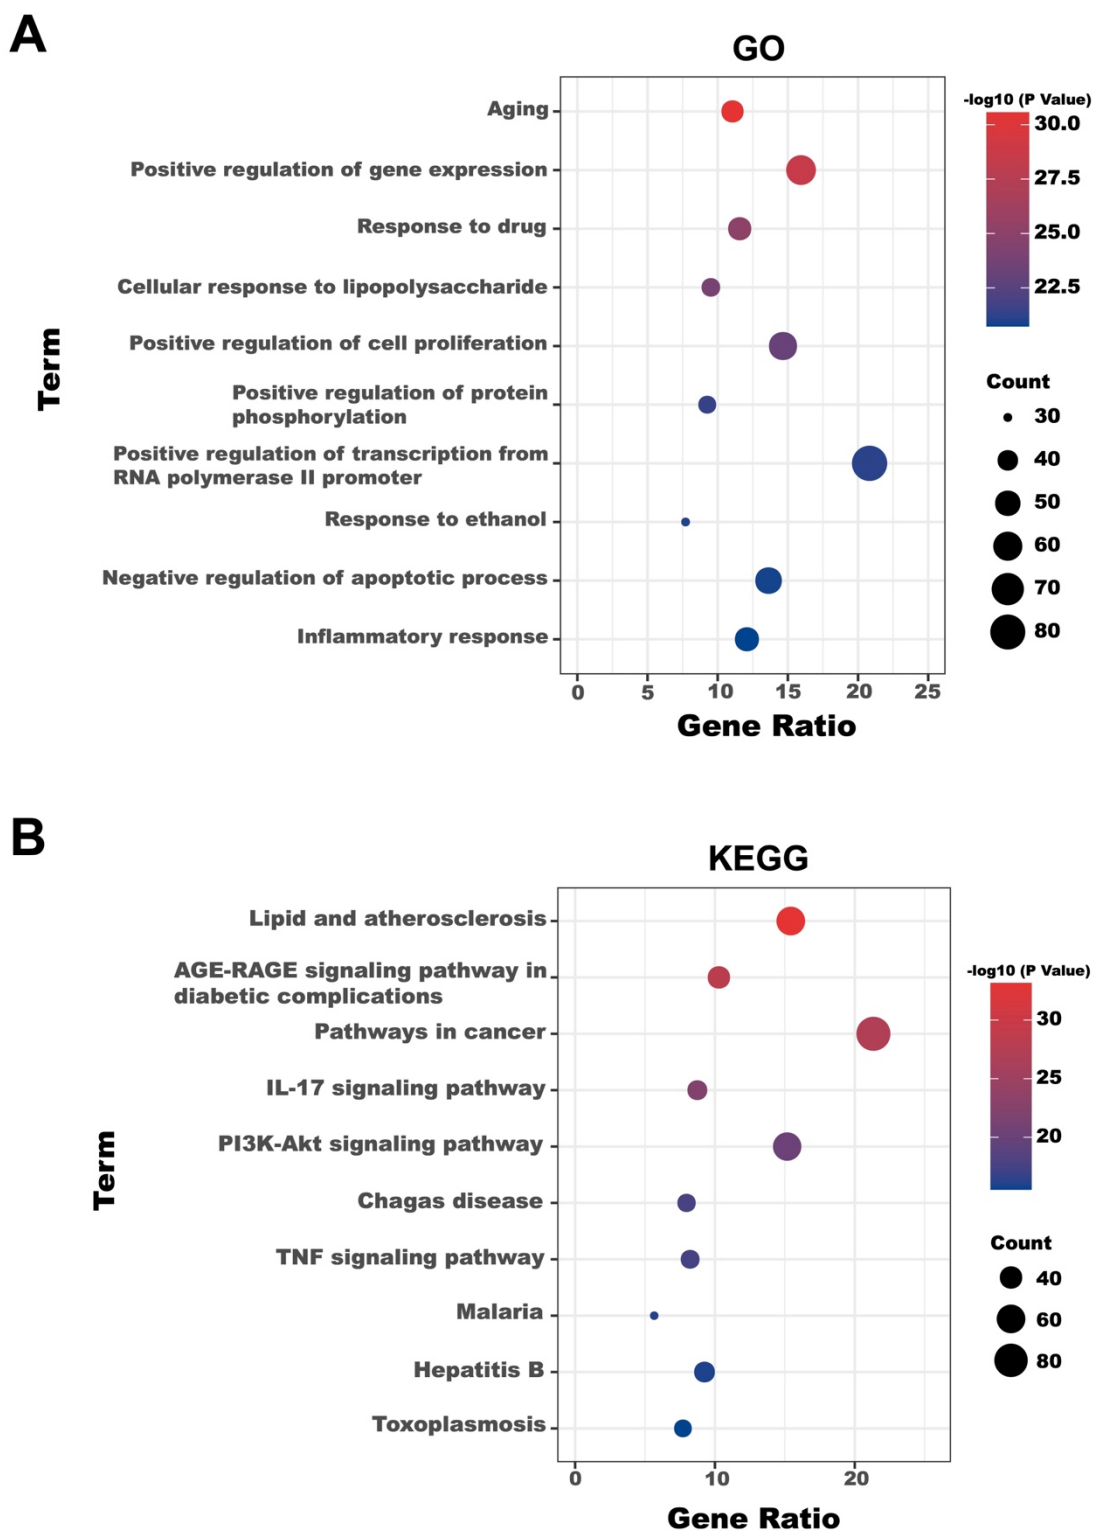

**Figure S2.** Pathway enrichment analysis of TDNPs target genes. (A) Gene ontology (GO) and (B) Kyoto Encyclopedia of Genes and Genomes (KEGG) enrichment analyses of the TDNPs target genes. TDNPs, turmeric-derived nanoparticles.

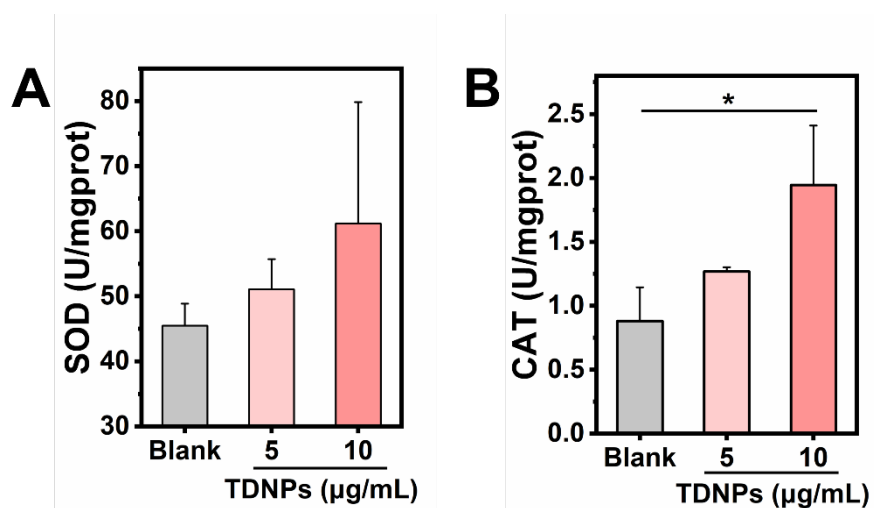

**Figure S3.** Analysis of antioxidant enzyme activities ( $n = 3$ ). Activities of the enzymes (A) superoxide dismutase (SOD), and (B) catalase (CAT) in L929 cells. Data are expressed as mean  $\pm$  SD. Statistical significance was based on one-way ANOVA with post-hoc test;  $*p < 0.05$ . TDNPs, turmeric-derived nanoparticles.

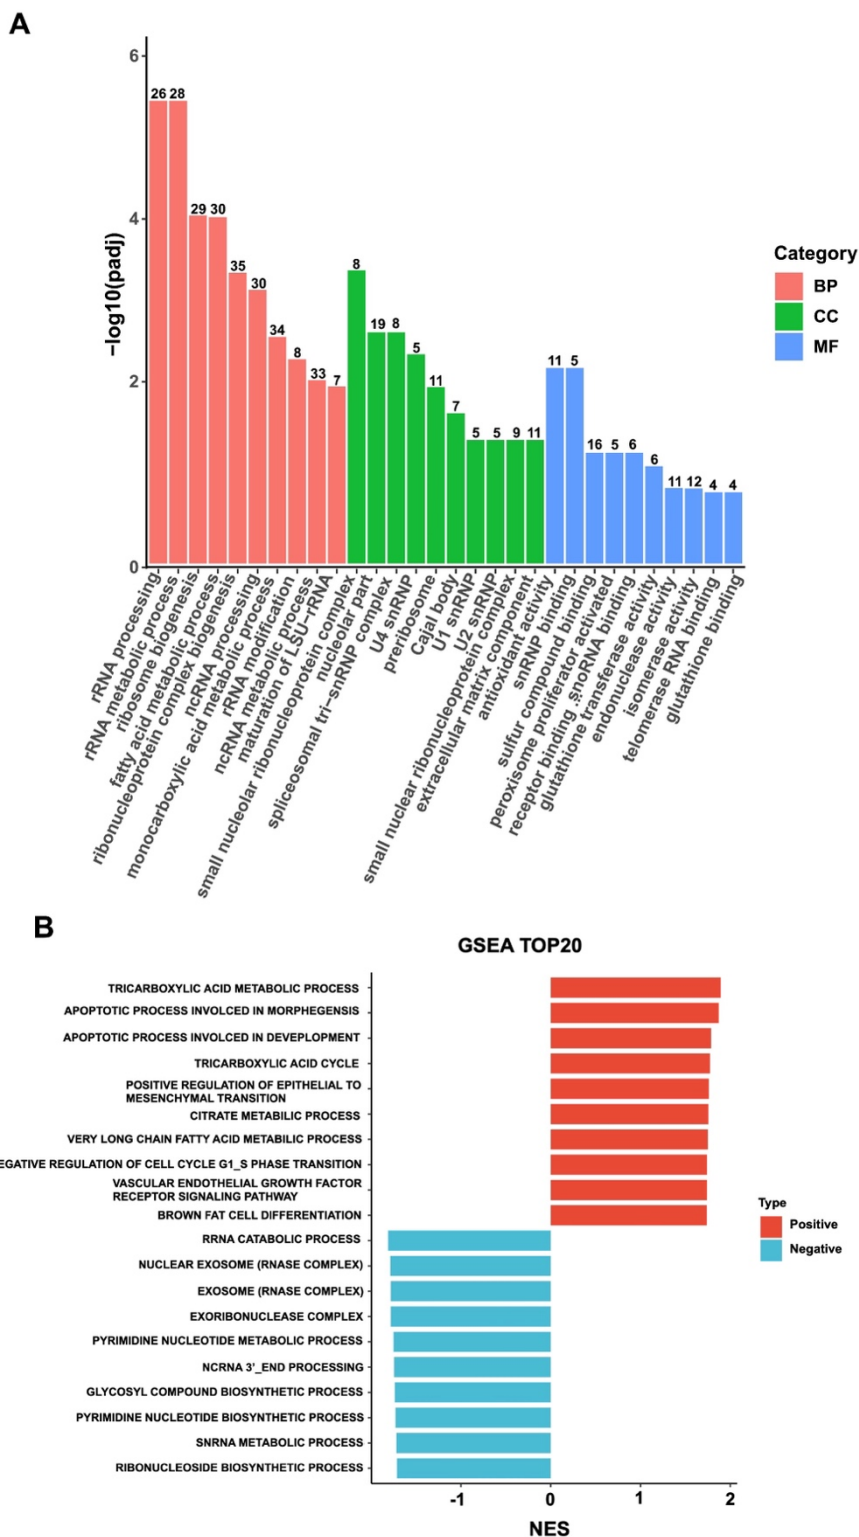

**Figure S4.** Gene Ontology (GO) and Gene Set Enrichment Analysis (GSEA) of differentially expressed genes (DEGs). (A) Enriched Gene Ontology biological process (BP), cellular component (CC), and molecular function (MF). (B) GSEA pathway enrichment analysis of DEGs.

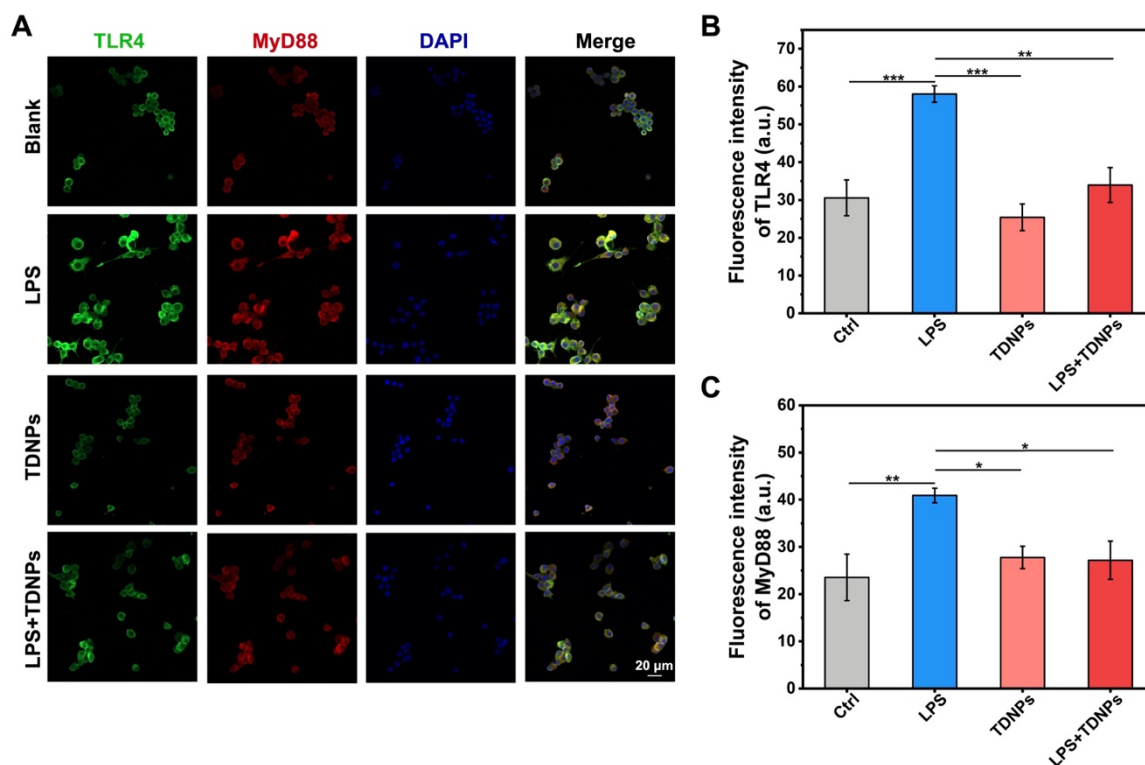

**Figure S5.** Immunofluorescence analysis of TLR4 and MyD88 expression in macrophages under different treatment conditions. (A) CLSM images of macrophages subjected to various treatments and labeled with TLR4 and MyD88 primary antibodies and secondary fluorescent antibodies. (B, C) Quantification of the (B) TLR4 and (C) MyD88 fluorescence intensities ( $n = 3$ ). Data are expressed as mean  $\pm$  SD. Statistical significance was based on one-way ANOVA with post-hoc test; \* $p < 0.05$ , \*\* $p < 0.01$ , and \*\*\* $p < 0.001$ . CLSM, confocal laser scanning microscopy; LPS, lipopolysaccharide; TDNPs, turmeric-derived nanoparticles.

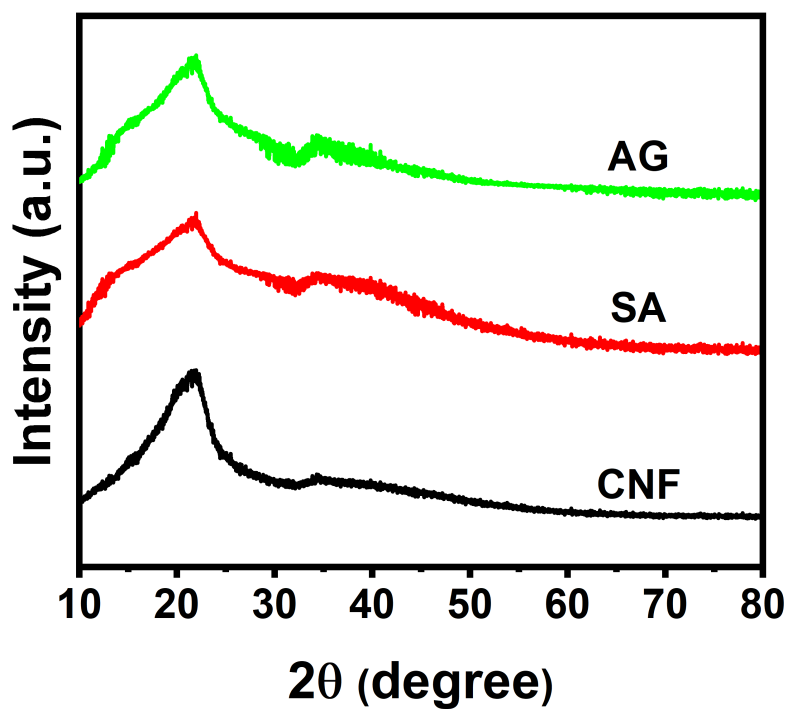

**Figure S6.** Powder X-ray diffraction (PXRD) patterns of cellulose nanofiber (CNF), sodium alginate (SA), and the aerogel (AG).

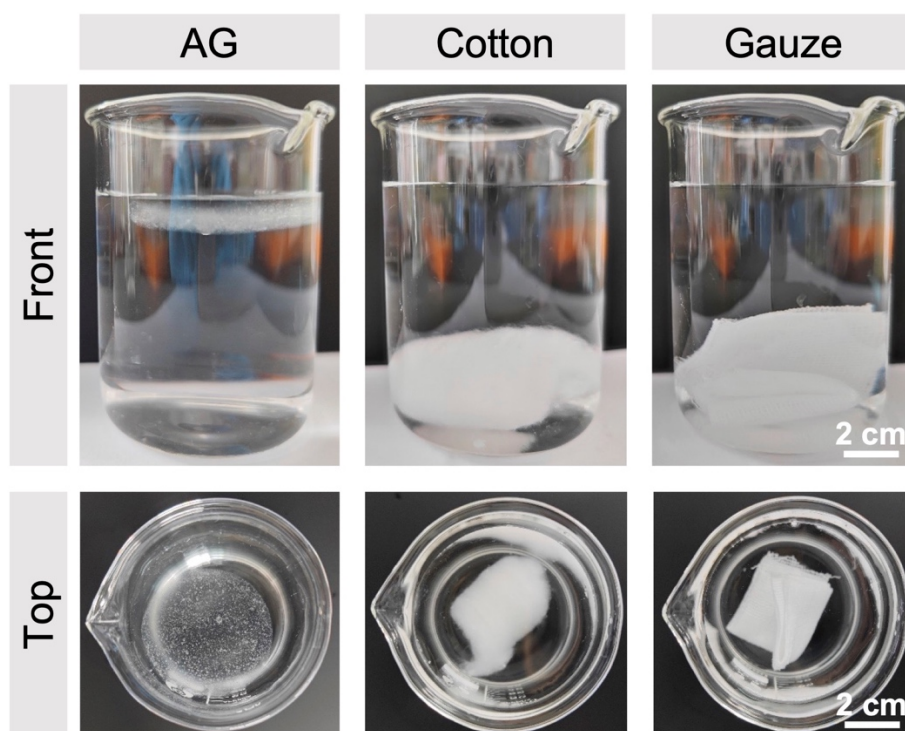

**Figure S7.** Photographs of the aerogel (AG), medical cotton, and gauze soaked in water.



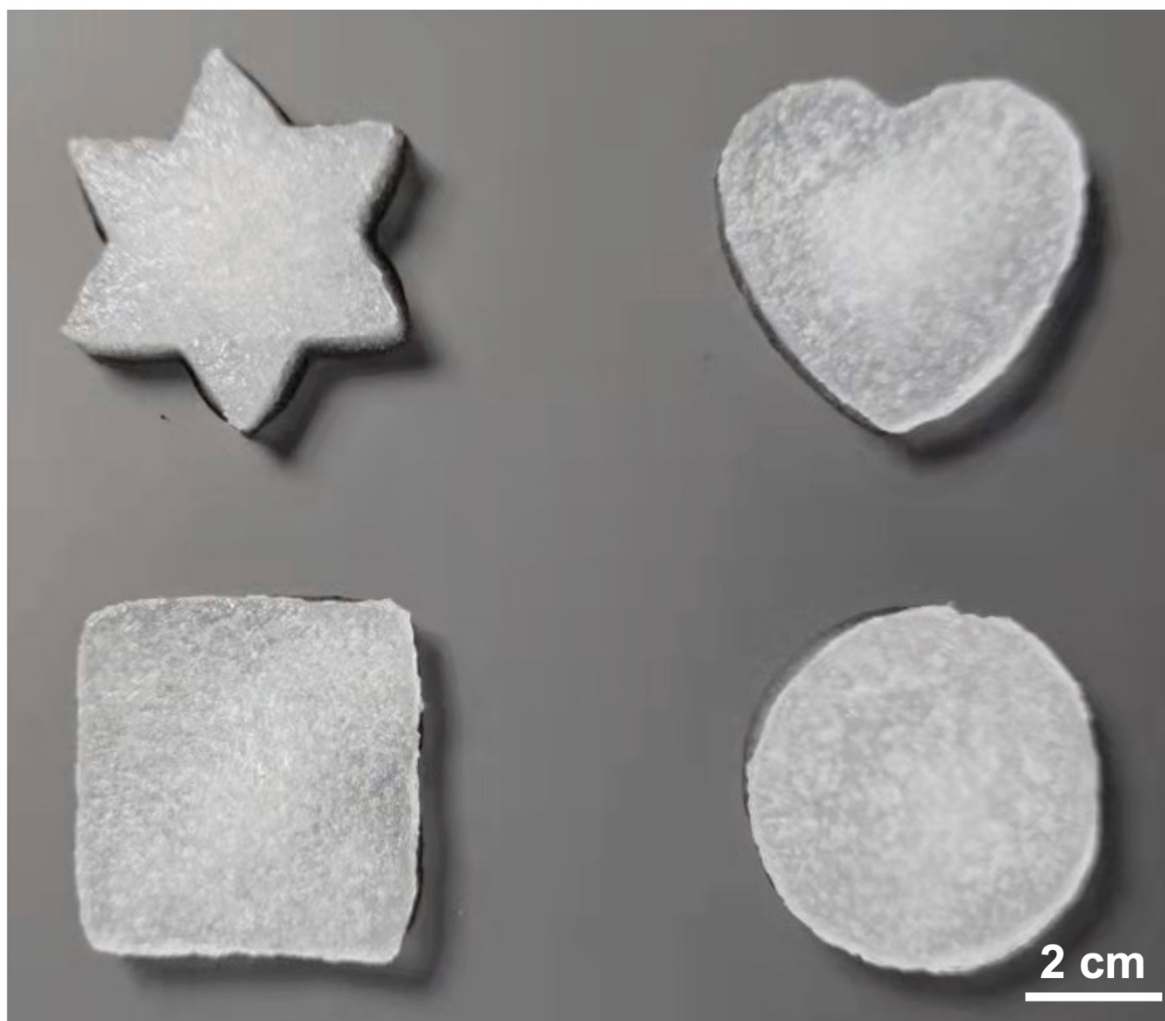

**Figure S8.** Four pieces of the aerogel (AG) made in different shapes.

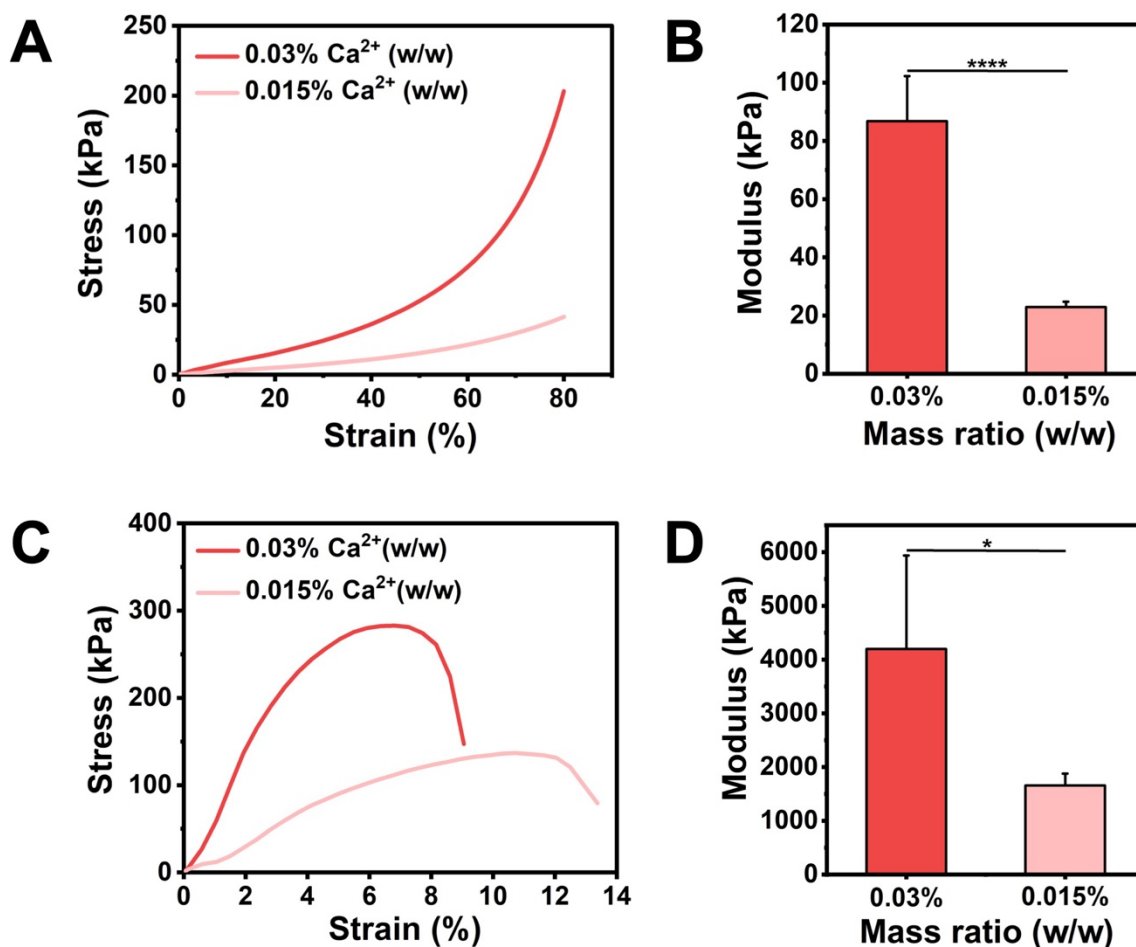

**Figure S9.** Characterization of the mechanical strength of aerogel (AG) cross-linked with different calcium ion ratios. (A, B) Tensile strength and (C, D) compression performance of AG. Data are shown as mean  $\pm$  SD. Statistical significance was based on Student's t-test; \* $p < 0.05$ , and \*\*\*\* $p < 0.0001$ .

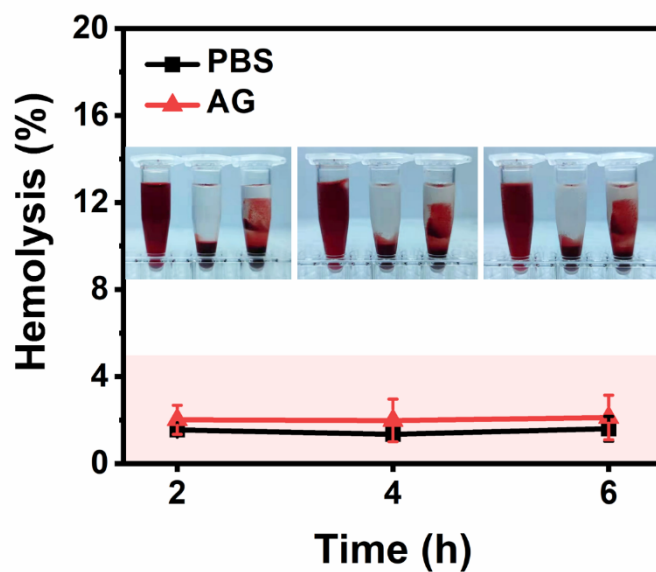

**Figure S10.** Hemolysis of aerogel (AG). The three tubes in the insert represent (from left to right) the positive control (PBS containing 1% Triton-X), negative control (PBS), and AG-treated red blood cells ( $n = 3$ ). Data are shown as mean  $\pm$  SD. PBS, phosphate buffer saline.

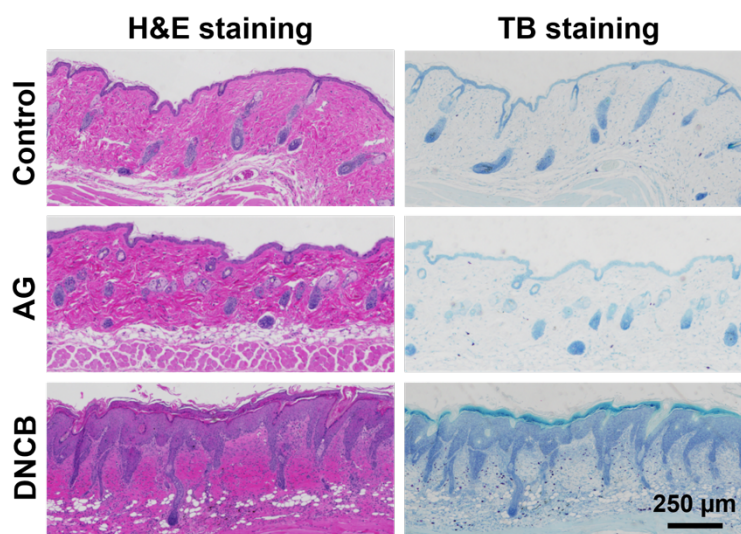

**Figure S11.** Histological analysis of skin samples collected from mice subjected to different treatments ( $n = 3$ ). AG, aerogel; DNCB, 1-chloro-2,4-dinitrobenzene; H&E staining, hematoxylin and eosin staining; TB, toluidine blue.

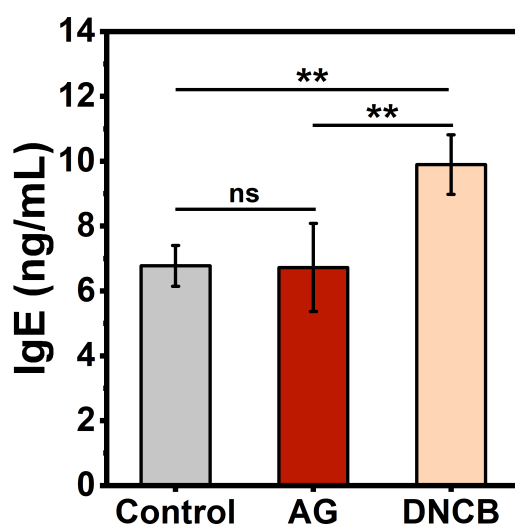

**Figure S12.** Serum IgE levels in mice with different treatments ( $n = 3$ ). Data are expressed as mean  $\pm$  SD. Statistical significance was based on one-way ANOVA with post-hoc test; Ns, not significant,  $**p < 0.01$ . AG, aerogel; DNCB, 1-chloro-2,4-dinitrobenzene.

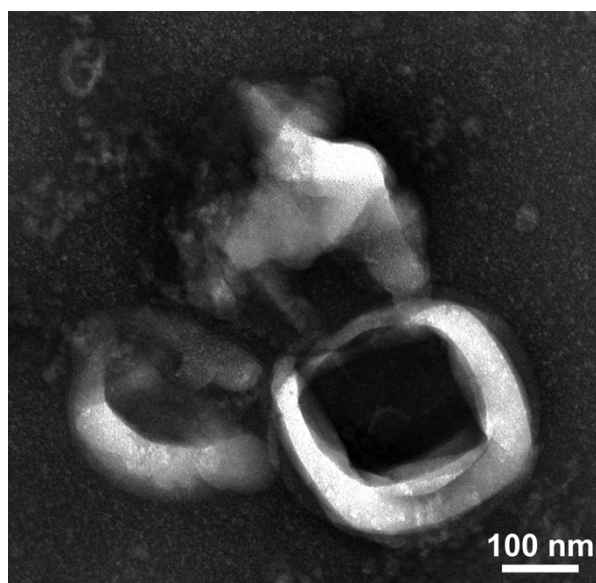

**Figure S13.** TEM image of TDNPs in TAG on day 49 of storage at 25°C. TEM, transmission electron microscopy; TDNPs, turmeric-derived nanoparticles; TAG, TDNPs-loaded aerogel (TDNPs@AG).

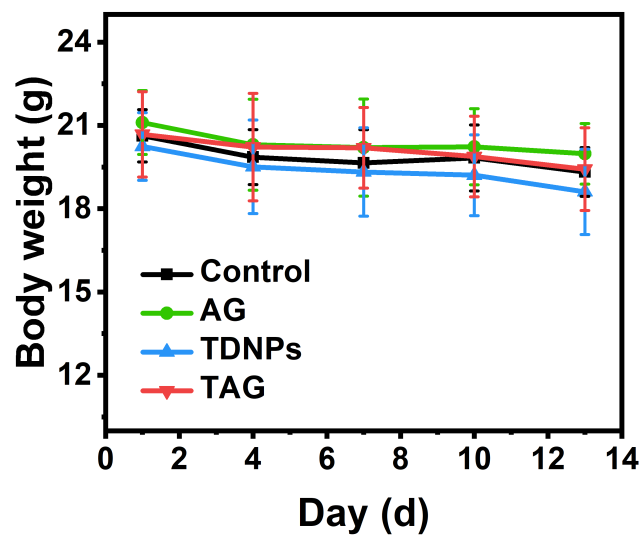

**Figure S14.** Changes in body weight in different treatment groups ( $n \geq 7$ ). Data are expressed as mean  $\pm$  SD. Statistical significance was based on one-way ANOVA with post-hoc test. AG, aerogel; TDNPs, turmeric-derived nanoparticles; TAG, TDNPs-loaded aerogel (TDNPs@AG).

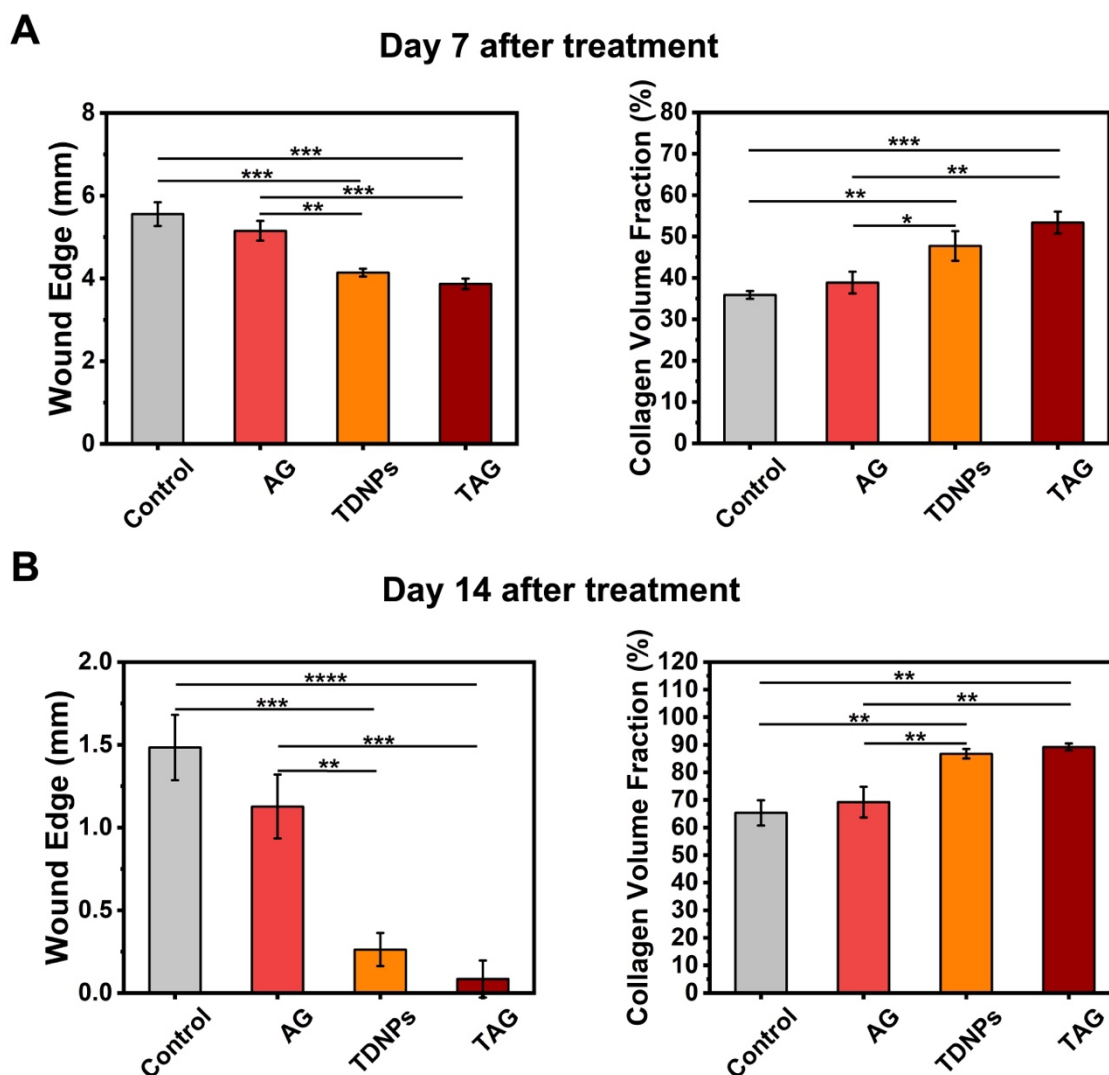

**Figure S15.** Quantification of (A) wound edge and (B) collagen volume fraction on days 7 and 14 after treatment ( $n = 3$ ). Data are expressed as mean  $\pm$  SD. Statistical significance was based on one-way ANOVA with post-hoc test; \* $p < 0.05$ , \*\* $p < 0.01$ , \*\*\* $p < 0.001$ , and \*\*\*\* $p < 0.0001$ . AG, aerogel; TDNPs, turmeric-derived nanoparticles; TAG, TDNPs-loaded aerogel (TDNPs@AG).

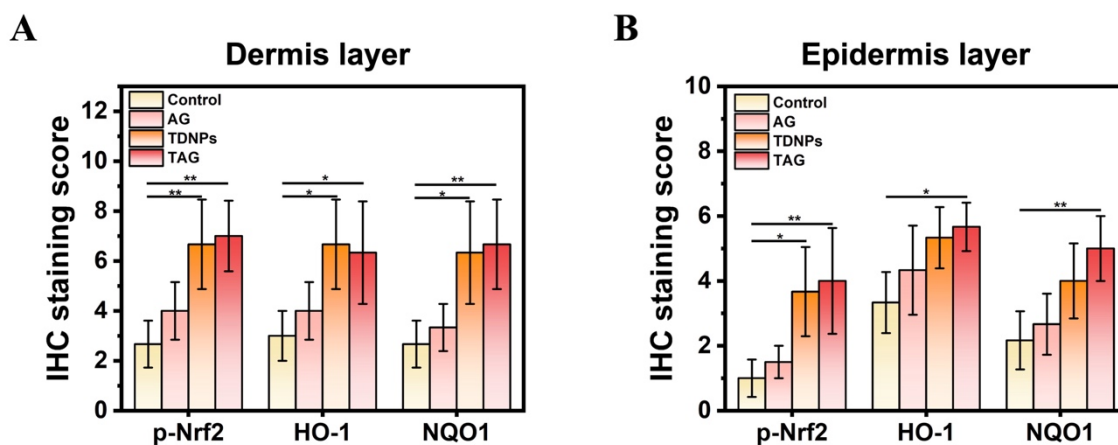

**Figure S16.** Quantification of immunohistochemical staining scores for p-Nrf2, HO-1, and NQO1 (shown in Figure 8H) ( $n = 6$ ). Data are expressed as mean  $\pm$  SD. Statistical significance was based on one-way ANOVA with post hoc test and non-parametric Wilcoxon rank-sum test;  $*p < 0.05$  and  $**p < 0.01$ . AG, aerogel; TDNPs, turmeric-derived nanoparticles; TAG, TDNPs-loaded aerogel (TDNPs@AG).

**Table S1.** Metabolite composition of turmeric and turmeric-derived nanoparticles (TDNPs).

| Name                                  | m/z      | rt(s)    | Superclass                              | Proportion of Turmeric | Proportion of TDNPs |
|---------------------------------------|----------|----------|-----------------------------------------|------------------------|---------------------|
| Choline                               | 104.1064 | 49.48    | Organic nitrogen compounds              | 1.22%                  | 15.09%              |
| Polygodial                            | 217.1603 | 587.549  | Undefined                               | 9.10%                  | 14.68%              |
| Ar-turmerone                          | 217.1607 | 850.568  | Lipids and lipid-like molecules         | 8.17%                  | 8.83%               |
| Retinene                              | 119.085  | 850.493  | Lipids and lipid-like molecules         | 6.70%                  | 7.61%               |
| Citrate                               | 191.0201 | 52.83955 | Organic acids and derivatives           | 0.19%                  | 7.03%               |
| Gamma-Nonalactone                     | 121.1009 | 936.71   | Organoheterocyclic compounds            | 5.27%                  | 4.31%               |
| Farnesal                              | 221.1921 | 906.161  | Lipids and lipid-like molecules         | 4.03%                  | 3.69%               |
| Curcumenol                            | 235.1722 | 559.692  | Lipids and lipid-like molecules         | 0.89%                  | 2.78%               |
| Indolelactic acid                     | 188.0714 | 165.457  | Organoheterocyclic compounds            | 1.30%                  | 2.42%               |
| Erucamide                             | 338.346  | 1417.735 | Undefined                               | 3.14%                  | 2.17%               |
| Phenylalanine                         | 166.0864 | 104.9815 | Organic acids and derivatives           | 0.92%                  | 2.08%               |
| L-Tryptophan                          | 205.0988 | 165.587  | Organoheterocyclic compounds            | 0.91%                  | 1.67%               |
| Curcumin                              | 369.1413 | 662.5945 | Phenylpropanoids and polyketides        | 27.47%                 | 1.30%               |
| N-acetyl-L-phenylalanine              | 120.0798 | 104.927  | Organic acids and derivatives           | 0.67%                  | 1.30%               |
| Confertifoline                        | 235.1713 | 396.985  | Undefined                               | 0.63%                  | 1.28%               |
| Adenosine                             | 268.1088 | 65.30935 | Nucleosides, nucleotides, and analogues | 0.24%                  | 1.17%               |
| Betaine                               | 118.0843 | 495.1585 | Organic acids and derivatives           | 0.80%                  | 0.96%               |
| Phthalic acid Mono-2-ethylhexyl Ester | 279.1615 | 913.683  | Undefined                               | 0.39%                  | 0.83%               |
| Alpha-Bisabolol                       | 205.1939 | 897.841  | Lipids and lipid-like molecules         | 0.57%                  | 0.80%               |
| Zerumbone                             | 201.1636 | 868.368  | Lipids and lipid-like molecules         | 0.48%                  | 0.74%               |
| Etodolac                              | 242.1766 | 438.971  | Organoheterocyclic compounds            | 0.72%                  | 0.73%               |
| Kinoprene                             | 203.1794 | 844.3575 | Lipids and lipid-like molecules         | 0.62%                  | 0.71%               |
| Xanthorrhizol                         | 135.0804 | 389.481  | Lipids and lipid-like molecules         | 0.29%                  | 0.61%               |
| Menthofuran                           | 151.1113 | 472.678  | Lipids and lipid-like molecules         | 0.17%                  | 0.58%               |
| Tetraethylene glycol                  | 133.0854 | 315.2625 | Organic oxygen compounds                | 0.01%                  | 0.57%               |
| 1,2-Benzenedicarboxylic acid          | 149.0261 | 189.006  | Undefined                               | 0.67%                  | 0.54%               |
| DL-tryptophan                         | 205.098  | 158.972  | Organoheterocyclic compounds            | 0.40%                  | 0.53%               |
| Zinniol                               | 265.1462 | 777.681  | Benzenoids                              | 0.01%                  | 0.49%               |
| Sucrose                               | 381.0811 | 50.731   | Organic oxygen compounds                | 2.08%                  | 0.48%               |
| Cis-aconitate                         | 173.0099 | 64.97545 | Organic acids and derivatives           | 0.04%                  | 0.46%               |
| Glucose                               | 179.0558 | 49.61565 | Organic oxygen compounds                | 0.63%                  | 0.41%               |
| Caprylic acid                         | 167.1071 | 586.421  | Lipids and lipid-like molecules         | 0.21%                  | 0.40%               |
| Perillaldehyde                        | 133.0997 | 586.425  | Lipids and lipid-like molecules         | 0.20%                  | 0.39%               |
| Fumarate                              | 115.0035 | 64.2241  | Organic acids and derivatives           | 0.04%                  | 0.34%               |
| Coniferyl alcohol                     | 163.0762 | 870.389  | Benzenoids                              | 0.29%                  | 0.34%               |
| DL-Norvaline                          | 118.0872 | 63.81645 | Undefined                               | 0.59%                  | 0.34%               |
| Pantothenate                          | 220.1147 | 115.393  | Organic oxygen compounds                | 0.02%                  | 0.31%               |
| 4-hydroxybenzoylcholine               | 224.1049 | 65.0257  | Benzenoids                              | 0.03%                  | 0.30%               |
| Isoalantolactone                      | 215.1442 | 311.1215 | Lipids and lipid-like molecules         | 0.17%                  | 0.29%               |
| (2-mercaptopropionylamino)acetic acid | 146.0294 | 43.5525  | Organic acids and derivatives           | 0.10%                  | 0.27%               |
| (-)-caryophyllene oxide               | 203.1772 | 906.281  | Lipids and lipid-like molecules         | 0.28%                  | 0.27%               |
| Quinate                               | 129.0688 | 1113.16  | Organic oxygen compounds                | 0.03%                  | 0.26%               |
| Alpha-Cyperone                        | 201.1629 | 936.71   | Lipids and lipid-like molecules         | 0.26%                  | 0.26%               |
| Succinate                             | 117.0168 | 73.7976  | Organic acids and derivatives           | 0.02%                  | 0.23%               |
| Diethyltoluamide                      | 192.1391 | 475.816  | Benzenoids                              | 0.24%                  | 0.22%               |
| Demethoxycurcumin                     | 337.1145 | 620.743  | Undefined                               | 9.90%                  | 0.22%               |



|                                                                                                |          |          |                                  |       |       |
|------------------------------------------------------------------------------------------------|----------|----------|----------------------------------|-------|-------|
| DL-Glutamic acid                                                                               | 148.0611 | 52.9233  | Organic acids and derivatives    | 0.21% | 0.22% |
| Dioctyl phthalate                                                                              | 391.2857 | 1376.96  | Benzenoids                       | 0.08% | 0.21% |
| 2-methyl-3-hydroxybutyric acid                                                                 | 119.0849 | 255.697  | Lipids and lipid-like molecules  | 0.12% | 0.20% |
| Sclareolide                                                                                    | 191.1793 | 867.9635 | Undefined                        | 0.13% | 0.20% |
| Triethylene glycol monobutyl ether                                                             | 151.0963 | 325.2645 | Organic oxygen compounds         | 0.00% | 0.19% |
| Farnesol                                                                                       | 121.0999 | 655.373  | Lipids and lipid-like molecules  | 0.12% | 0.18% |
| Tefluthrin                                                                                     | 177.0226 | 52.62045 | Benzenoids                       | 0.02% | 0.18% |
| Agomelatine                                                                                    | 244.1536 | 161.221  | Organic acids and derivatives    | 0.08% | 0.17% |
| Ketamine                                                                                       | 238.1179 | 128.874  | Benzenoids                       | 0.00% | 0.16% |
| Dibutyl phthalate                                                                              | 279.161  | 3.03449  | Benzenoids                       | 0.12% | 0.16% |
| 3,4-dihydroxymandelic acid                                                                     | 149.0225 | 2.37308  | Benzenoids                       | 0.17% | 0.16% |
| Isoeugenyl acetate                                                                             | 207.1229 | 1339.91  | Undefined                        | 0.12% | 0.16% |
| Thiamine monophosphate                                                                         | 122.0694 | 1495.865 | Organoheterocyclic compounds     | 0.12% | 0.16% |
| Zearalenone                                                                                    | 301.1425 | 911.6615 | Phenylpropanoids and polyketides | 0.07% | 0.16% |
| Edaravone                                                                                      | 175.1113 | 311.0585 | Organoheterocyclic compounds     | 0.08% | 0.16% |
| Thiosulfuric acid                                                                              | 134.8945 | 1407.17  | Homogeneous non-metal compounds  | 0.10% | 0.15% |
| C17-sphinganine                                                                                | 288.2914 | 636.322  | Organic nitrogen compounds       | 0.07% | 0.15% |
| 6-benzylaminopurine                                                                            | 225.9901 | 43.316   | Organoheterocyclic compounds     | 0.02% | 0.15% |
| ProstaglandinF2 $\alpha$                                                                       | 353.2144 | 994.445  | Lipids and lipid-like molecules  | 0.11% | 0.14% |
| Diisodecyl phthalate                                                                           | 469.3251 | 1144.09  | Benzenoids                       | 0.10% | 0.12% |
| Psoralidin                                                                                     | 337.1083 | 53.5893  | Phenylpropanoids and polyketides | 0.02% | 0.12% |
| Eflornithine                                                                                   | 166.0544 | 72.6176  | Organic acids and derivatives    | 0.03% | 0.12% |
| DL-asparagine                                                                                  | 131.0451 | 48.1101  | Organic acids and derivatives    | 0.72% | 0.11% |
| Tyr-Ser                                                                                        | 269.1157 | 72.687   | Undefined                        | 0.02% | 0.11% |
| 4-hydroxy-4'-chlorobiphenyl                                                                    | 203.0176 | 64.3363  | Benzenoids                       | 0.03% | 0.11% |
| Indole-3-carboxaldehyde                                                                        | 146.0594 | 165.457  | Organoheterocyclic compounds     | 0.05% | 0.11% |
| Azelaic acid                                                                                   | 135.0803 | 640.4865 | Lipids and lipid-like molecules  | 0.21% | 0.11% |
| 1,2-propanediol, 3-(1,3-benzodioxol-5-yl)-                                                     | 195.0506 | 50.3007  | Undefined                        | 0.03% | 0.11% |
| Homocitrate                                                                                    | 205.0288 | 275.277  | Organic acids and derivatives    | 0.00% | 0.11% |
| Parthenolide                                                                                   | 249.148  | 392.778  | Lipids and lipid-like molecules  | 0.09% | 0.11% |
| Citraconic acid                                                                                | 129.0175 | 65.13515 | Lipids and lipid-like molecules  | 0.01% | 0.10% |
| 3-furancarboxylic acid, tetrahydro-4-methylene-5-oxo-2-propyl-, (2r,3s)-rel-                   | 183.065  | 256.752  | Organoheterocyclic compounds     | 0.07% | 0.10% |
| Bisphenol a                                                                                    | 229.1432 | 315.2625 | Benzenoids                       | 0.00% | 0.10% |
| Cumyl alcohol                                                                                  | 105.069  | 586.115  | Lipids and lipid-like molecules  | 0.07% | 0.10% |
| Cis-jasmone                                                                                    | 107.0841 | 590.392  | Organic oxygen compounds         | 0.03% | 0.09% |
| 4-pyridinecarboxylic acid                                                                      | 124.0388 | 44.2637  | Organoheterocyclic compounds     | 0.09% | 0.09% |
| 2-butanol, 1-[(2,3-dihydro-7-methyl-1h-inden-4-yl)oxy]-3-[(1-methylethyl)amino]-, (2r,3r)-rel- | 260.1865 | 209.711  | Undefined                        | 0.03% | 0.09% |
| Octadecanoic acid                                                                              | 283.2633 | 1365.655 | Lipids and lipid-like molecules  | 0.02% | 0.09% |
| trans-3-Coumaric acid                                                                          | 147.0468 | 405.1165 | Undefined                        | 0.11% | 0.09% |
| Beta-Damascone                                                                                 | 137.0956 | 868.422  | Organic oxygen compounds         | 0.05% | 0.08% |
| Moroxydine                                                                                     | 172.1337 | 55.1237  | Organic nitrogen compounds       | 0.00% | 0.08% |
| Trans-ferulic acid                                                                             | 177.0532 | 432.462  | Phenylpropanoids and polyketides | 0.34% | 0.08% |
| (+/-)-n-acetyl-3,4-methylenedioxyamphetamine                                                   | 222.1261 | 239.079  | Undefined                        | 0.02% | 0.07% |
| Myo-inositol                                                                                   | 127.0377 | 128.843  | Organic oxygen compounds         | 0.07% | 0.07% |
| Clozapine                                                                                      | 327.1582 | 800.7975 | Organoheterocyclic compounds     | 0.04% | 0.07% |
| 4-(methylnitrosamino)-1-(3-pyridyl)-1-butanol                                                  | 192.1223 | 1457.06  | Undefined                        | 0.06% | 0.07% |
| D-aspartic acid                                                                                | 132.031  | 61.88995 | Organic acids and derivatives    | 0.06% | 0.07% |
| Glutaric acid                                                                                  | 113.0102 | 70.0025  | Organic acids and derivatives    | 0.03% | 0.07% |
| Germacrone                                                                                     | 219.1695 | 338.116  | Lipids and lipid-like molecules  | 0.03% | 0.06% |

|                                                                                       |          |          |                                 |       |       |
|---------------------------------------------------------------------------------------|----------|----------|---------------------------------|-------|-------|
| Phenylacetaldehyde                                                                    | 103.0534 | 105.278  | Benzenoids                      | 0.02% | 0.06% |
| L-Glutamate                                                                           | 130.0514 | 49.0098  | Organic acids and derivatives   | 0.11% | 0.06% |
| Sempervirine                                                                          | 273.1466 | 390.0535 | Organoheterocyclic compounds    | 0.07% | 0.06% |
| Gamma-Linolenoyl ethanolamide                                                         | 322.2734 | 1057.38  | Organic nitrogen compounds      | 0.04% | 0.06% |
| 3-ureidopropionic acid                                                                | 155.0392 | 49.9976  | Organic acids and derivatives   | 0.05% | 0.06% |
| 1-(1',3'-benzodioxol-5'-yl)-2-butanamine                                              | 194.1204 | 585.606  | Undefined                       | 0.04% | 0.06% |
| 1,3-benzenediol, 5-methyl-4-[(1r,6r)-3-methyl-6-(1-methylethenyl)-2-cyclohexen-1-yl]- | 259.1652 | 655.904  | Lipids and lipid-like molecules | 0.04% | 0.06% |
| Chamazulene                                                                           | 157.1015 | 587.486  | Lipids and lipid-like molecules | 0.03% | 0.06% |
| Camphor                                                                               | 153.1091 | 1445.37  | Lipids and lipid-like molecules | 0.05% | 0.06% |
| His-Lys                                                                               | 284.0992 | 72.4559  | Undefined                       | 0.01% | 0.05% |
| Prednisolone                                                                          | 181.1021 | 946.32   | Lipids and lipid-like molecules | 0.00% | 0.05% |
| Docosanamide                                                                          | 340.3562 | 1496.23  | Lipids and lipid-like molecules | 0.07% | 0.05% |
| 3-cyclohexyl-1,1-dimethylurea                                                         | 171.1388 | 568.466  | Organic acids and derivatives   | 0.04% | 0.05% |
| N8-acetylspermidine                                                                   | 171.1383 | 1349.44  | Organic acids and derivatives   | 0.05% | 0.05% |
| Oxycodone                                                                             | 316.1748 | 155.0975 | Undefined                       | 0.00% | 0.05% |
| Alantolactone                                                                         | 215.1424 | 415.3275 | Lipids and lipid-like molecules | 0.01% | 0.05% |
| Hydrocortisone                                                                        | 345.1873 | 256.321  | Lipids and lipid-like molecules | 0.01% | 0.05% |
| [6]-gingerol                                                                          | 277.1772 | 385.064  | Benzenoids                      | 0.04% | 0.05% |
| 13-keto-9z,11e-octadecadienoic acid                                                   | 295.2281 | 871.6    | Lipids and lipid-like molecules | 0.00% | 0.05% |
| Cocaine                                                                               | 304.1713 | 58.3935  | Benzenoids                      | 0.01% | 0.04% |
| 2-aminoadipic acid                                                                    | 144.0656 | 164.5805 | Organic acids and derivatives   | 0.02% | 0.04% |
| Mesoxalate                                                                            | 116.9827 | 43.01365 | Organic acids and derivatives   | 0.04% | 0.04% |
| Thiodiglycol sulfoxide                                                                | 139.0396 | 77.9915  | Undefined                       | 0.01% | 0.04% |
| N-carboxyethyl-gamma-aminobutyric acid                                                | 140.0797 | 1439.55  | Organic acids and derivatives   | 0.05% | 0.04% |
| Isopentenyladenine                                                                    | 204.1231 | 1455.515 | Organoheterocyclic compounds    | 0.03% | 0.04% |
| Bisdemethoxycurcumin                                                                  | 309.1176 | 581.71   | Undefined                       | 1.07% | 0.04% |
| Ethyl glucuronide                                                                     | 281.093  | 264.901  | Organic oxygen compounds        | 0.00% | 0.04% |
| Galanthamine                                                                          | 231.0986 | 1099.435 | Undefined                       | 0.01% | 0.04% |
| Desipramine                                                                           | 231.1607 | 183.344  | Organoheterocyclic compounds    | 0.02% | 0.04% |
| L-hydroxyarginine                                                                     | 128.0612 | 959.246  | Organic acids and derivatives   | 0.01% | 0.03% |
| L-pyroglutamic acid                                                                   | 128.0351 | 48.8321  | Organic acids and derivatives   | 0.02% | 0.03% |
| 13s-hydroperoxy-9z,11e-octadecadienoic acid                                           | 293.2145 | 870.927  | Lipids and lipid-like molecules | 0.00% | 0.03% |
| 11-(phenylcarbonyl)-7,11-diazatricyclo[7.3.1.0<2,7>]trideca-2,4-dien-6-one            | 295.1347 | 678.0765 | Organoheterocyclic compounds    | 0.00% | 0.03% |
| Rotundine                                                                             | 356.19   | 971.9135 | Undefined                       | 0.00% | 0.03% |
| 5alpha-androstan-17beta-ol-3-one                                                      | 173.1298 | 1220.265 | Lipids and lipid-like molecules | 0.02% | 0.03% |
| L-dihydrorootate                                                                      | 157.0246 | 194.71   | Organic acids and derivatives   | 0.01% | 0.03% |
| DL-threonine                                                                          | 102.054  | 52.16405 | Organic acids and derivatives   | 0.03% | 0.03% |
| Dibutyl adipate                                                                       | 259.1667 | 553.026  | Lipids and lipid-like molecules | 0.00% | 0.03% |
| 2-hydroxybenzyl alcohol                                                               | 107.0705 | 296.8415 | Benzenoids                      | 0.02% | 0.03% |
| Gestrinone                                                                            | 309.1688 | 269.414  | Lipids and lipid-like molecules | 0.02% | 0.03% |
| L-Histidine                                                                           | 156.0743 | 59.0566  | Organic acids and derivatives   | 0.22% | 0.03% |
| Oleoyl ethylamide                                                                     | 310.3024 | 1231.46  | Lipids and lipid-like molecules | 0.02% | 0.03% |
| L-propionylcarnitine                                                                  | 240.1179 | 130.245  | Lipids and lipid-like molecules | 0.00% | 0.03% |
| Thioperamide                                                                          | 293.1721 | 240.9115 | Undefined                       | 0.02% | 0.03% |
| Dodecanoic acid, 12-[[[cyclohexylamino]carbonyl]amino]-                               | 198.1852 | 439.246  | Lipids and lipid-like molecules | 0.03% | 0.03% |
| Isopentenyl-adenine-9-glucoside                                                       | 366.1779 | 226.824  | Organic oxygen compounds        | 0.01% | 0.03% |
| Pimelic acid                                                                          | 221.0968 | 279.433  | Lipids and lipid-like molecules | 0.02% | 0.02% |
| Nootkatone                                                                            | 145.1011 | 586.179  | Lipids and lipid-like molecules | 0.02% | 0.02% |
| Cycloate                                                                              | 216.1253 | 1492.845 | Organosulfur compounds          | 0.02% | 0.02% |

|                                                                                                     |          |                               |                                            |       |       |
|-----------------------------------------------------------------------------------------------------|----------|-------------------------------|--------------------------------------------|-------|-------|
| D-Psicose                                                                                           | 127.0384 | 49.764                        | Organic oxygen compounds                   | 0.70% | 0.02% |
| Tetrahydrocurcumin                                                                                  | 355.1561 | 297.829                       | Phenylpropanoids and polyketides           | 0.06% | 0.02% |
| D-Mannose                                                                                           | 163.0562 | 93.0283                       | Organic oxygen compounds                   | 0.01% | 0.02% |
| Huperzine b                                                                                         | 257.1514 | 700.33                        | Undefined                                  | 0.03% | 0.02% |
| Matairesinol                                                                                        | 376.1785 | 240.287                       | Lignans, neolignans, and related compounds | 0.00% | 0.02% |
| Metronidazole                                                                                       | 128.062  | 781.903                       | Organoheterocyclic compounds               | 0.01% | 0.02% |
| Kendomycin                                                                                          | 485.2839 | 1156.12                       | Undefined                                  | 0.01% | 0.02% |
| N-octadecylamine                                                                                    | 270.3167 | 993.119                       | Organic nitrogen compounds                 | 0.06% | 0.02% |
| D-glucuronic acid                                                                                   | 101.0238 | 60.35715                      | Organic oxygen compounds                   | 0.01% | 0.02% |
| 16-Hydroxypalmitic acid                                                                             | 271.2313 | 800.546                       | Lipids and lipid-like molecules            | 0.01% | 0.02% |
| (-)-Secoisolariciresinol                                                                            | 361.19   | 292.9405                      | Lignans, neolignans and related compounds  | 0.00% | 0.02% |
| Rac-7-hydroxypropranolol                                                                            | 258.1534 | 120.75                        | Benzenoids                                 | 0.00% | 0.02% |
| (-)-Perillyl alcohol                                                                                | 107.085  | 935.649                       | Lipids and lipid-like molecules            | 0.01% | 0.02% |
| Cinchonine                                                                                          | 293.1808 | 979.565                       | Undefined                                  | 0.00% | 0.02% |
| 5-hydroxymethyl-2-furancarboxylic acid                                                              | 143.0343 | 165.4265                      | Organoheterocyclic compounds               | 0.01% | 0.02% |
| Dextromethorphan                                                                                    | 272.1866 | 207.322                       | Undefined                                  | 0.01% | 0.01% |
| 5-androstene-3 $\beta$ ,17 $\beta$ -diol                                                            | 131.0853 | 586.3845                      | Lipids and lipid-like molecules            | 0.00% | 0.01% |
| Galactinol                                                                                          | 387.1164 | 219.419                       | Organic oxygen compounds                   | 0.01% | 0.01% |
| (z)-5,8,11-trihydroxyoctadec-9-enoic acid                                                           | 348.2766 | 451.5545                      | Lipids and lipid-like molecules            | 0.00% | 0.01% |
| P-methoxycinnamic acid ethyl ester                                                                  | 207.1264 | 308.584                       | Phenylpropanoids and polyketides           | 0.05% | 0.01% |
| Diethylstilbestrol                                                                                  | 269.1693 | 244.4565                      | Undefined                                  | 0.01% | 0.01% |
| Trifluoperazine                                                                                     | 425.1927 | 261.5765                      | Undefined                                  | 0.00% | 0.01% |
| 3-hydroxyanthranilic acid                                                                           | 136.052  | 643.12                        | Benzenoids                                 | 0.01% | 0.01% |
| Kynurenic acid                                                                                      | 212.0197 | 405.864                       | Organoheterocyclic compounds               | 0.00% | 0.01% |
| Tetraethylene glycol monomethyl ether                                                               | 103.0536 | 936.16                        | Organic oxygen compounds                   | 0.01% | 0.01% |
| Indole                                                                                              | 135.0888 | 953.198                       | Organoheterocyclic compounds               | 0.01% | 0.01% |
| Alpha-Piperidinobutiophenone                                                                        | 232.1665 | 951.693                       | Organic oxygen compounds                   | 0.01% | 0.01% |
| Alprenolol                                                                                          | 250.1793 | 1238.765                      | Benzenoids                                 | 0.01% | 0.01% |
| Mefloquine                                                                                          | 361.1205 | 442.0255                      | Undefined                                  | 0.02% | 0.01% |
| Pyrrolidine, 2-(diphenylmethyl)-, (2s)-                                                             | 143.0855 | 585.767                       | Benzenoids                                 | 0.01% | 0.01% |
| Threitol                                                                                            | 123.0802 | 326.0685                      | Organic oxygen compounds                   | 0.01% | 0.01% |
| Benzoic acid, 4-[[[(5,6,7,8-tetrahydro-5,5,8,8-tetramethyl-2-naphthalenyl)carbonyl]amino]-Amastatin | 215.143  | 664.464                       | Benzenoids                                 | 0.03% | 0.01% |
| 473.2784                                                                                            | 1265.95  | Organic acids and derivatives | 0.00%                                      | 0.01% |       |
| Diphenylamine                                                                                       | 170.0943 | 49.0199                       | Benzenoids                                 | 0.01% | 0.01% |
| Isonicotinamide                                                                                     | 123.0553 | 419.6985                      | Organoheterocyclic compounds               | 0.01% | 0.01% |
| 3-phenoxy-1-propanol                                                                                | 135.0808 | 1052.82                       | Undefined                                  | 0.01% | 0.01% |
| Hydrocotarnine                                                                                      | 222.1121 | 279.418                       | Undefined                                  | 0.01% | 0.01% |
| Sphingosine                                                                                         | 300.293  | 836.694                       | Organic nitrogen compounds                 | 0.00% | 0.01% |
| N2,N2-Dimethylguanosine                                                                             | 312.133  | 108.15                        | Undefined                                  | 0.00% | 0.01% |
| DL-serine                                                                                           | 104.0346 | 47.4748                       | Organic acids and derivatives              | 0.04% | 0.01% |
| 1-naphthol                                                                                          | 143.0486 | 584.623                       | Benzenoids                                 | 0.08% | 0.01% |
| Tris(hydroxymethyl)aminomethane                                                                     | 122.0598 | 97.82105                      | Organic nitrogen compounds                 | 0.01% | 0.01% |
| DL-tyrosine                                                                                         | 182.0807 | 51.9498                       | Organic acids and derivatives              | 0.40% | 0.01% |
| 3'-O-methyladenosine                                                                                | 282.116  | 52.339                        | Nucleosides, nucleotides, and analogues    | 0.01% | 0.01% |
| Palmitamide                                                                                         | 256.2616 | 640.6415                      | Lipids and lipid-like molecules            | 0.01% | 0.01% |
| Secoisolariciresinol                                                                                | 361.1728 | 309.281                       | Lignans, neolignans and related compounds  | 0.28% | 0.01% |
| 4-coumaroylcholine                                                                                  | 250.1569 | 282.9455                      | Phenylpropanoids and polyketides           | 0.00% | 0.01% |
| Benzothiazole, 2-methylmercapto-                                                                    | 182.0102 | 574.171                       | Undefined                                  | 0.00% | 0.01% |
| Trimethoprim                                                                                        | 291.1573 | 419.118                       | Benzenoids                                 | 0.01% | 0.01% |

|                                                                            |          |          |                                          |       |       |
|----------------------------------------------------------------------------|----------|----------|------------------------------------------|-------|-------|
| Dibenzylamine                                                              | 198.1283 | 268.9815 | Benzenoids                               | 0.00% | 0.01% |
| 3-Phenylpropanoic acid                                                     | 133.0616 | 634.75   | Phenylpropanoids and polyketides         | 0.01% | 0.00% |
| Isoxaben                                                                   | 331.1595 | 434.8695 | Benzenoids                               | 0.01% | 0.00% |
| Benzylazanium                                                              | 107.0746 | 542.454  | Undefined                                | 0.00% | 0.00% |
| Saccharin                                                                  | 181.9928 | 1488.11  | Undefined                                | 0.00% | 0.00% |
| 9-hydroperoxy-10e,12z-octadecadienoic acid                                 | 293.212  | 778.622  | Lipids and lipid-like molecules          | 0.00% | 0.00% |
| 16-hydroxyhexadecanoic acid                                                | 271.2293 | 825.672  | Lipids and lipid-like molecules          | 0.00% | 0.00% |
| 3-hydroxy-3-methylglutaric acid                                            | 109.0281 | 55.5533  | Lipids and lipid-like molecules          | 0.02% | 0.00% |
| Glucose-1-phosphate                                                        | 241.0112 | 58.3682  | Organic oxygen compounds                 | 0.01% | 0.00% |
| Pentaethylene glycol                                                       | 239.147  | 162.897  | Organic oxygen compounds                 | 0.00% | 0.00% |
| 1,1,1-tris(hydroxymethyl)propane                                           | 269.1884 | 383.255  | Organic oxygen compounds                 | 0.01% | 0.00% |
| Stearic acid                                                               | 283.2685 | 1405.31  | Lipids and lipid-like molecules          | 0.00% | 0.00% |
| L-Fucose                                                                   | 165.0554 | 43.0495  | Organic oxygen compounds                 | 0.18% | 0.00% |
| Enterodiol                                                                 | 325.1478 | 506.176  | Lignans neolignans and related compounds | 0.07% | 0.00% |
| Pro-Trp                                                                    | 302.3027 | 749.2185 | Organic nitrogen compounds               | 0.01% | 0.00% |
| Benzamide, n-[(1s)-1-(aminocarbonyl)-4-(2-chloro-1-iminoethylamino)butyl]- | 311.1322 | 850.24   | Benzenoids                               | 0.00% | 0.00% |
| 1-Oleoyl-sn-glycero-3-phosphocholine                                       | 522.3442 | 886.073  | Undefined                                | 0.00% | 0.00% |

**Table S2.** Number of interactional genes of the 10 active metabolites in Comparative Toxicogenomics Database (CTD).

| <b>Name</b>   | <b>Inter-gene number</b> |
|---------------|--------------------------|
| Choline       | 5030                     |
| Ar-turmerone  | 7                        |
| Retinene      | 58                       |
| Citrate       | 42                       |
| Phenylalanine | 493                      |
| L-Tryptophan  | 24                       |
| Curcumin      | 982                      |
| Adenosine     | 795                      |
| Betaine       | 227                      |
| Zerumbone     | 61                       |

**Table S3.** Water vapor transmission rate (WVTR) analysis of the aerogel (AG).

| Number | Cup | Weighing frequency | Weight (g) | WVTR [g/(m <sup>2</sup> /day)] |
|--------|-----|--------------------|------------|--------------------------------|
| 1      | 1   | 1                  | 121.6894   | 0.0000                         |
| 2      | 1   | 2                  | 120.9407   | 2038.4636                      |
| 3      | 1   | 3                  | 120.1983   | 2021.3107                      |
| 4      | 1   | 4                  | 119.4773   | 1963.0456                      |
| 5      | 1   | 5                  | 118.7584   | 1957.3280                      |
| 6      | 1   | 6                  | 118.0500   | 1928.7399                      |
| 7      | 1   | 7                  | 117.3442   | 1921.6610                      |
| 8      | 1   | 8                  | 116.6459   | 1901.2410                      |
| 9      | 1   | 9                  | 115.9500   | 1894.7065                      |
| 10     | 1   | 10                 | 115.2580   | 1884.0881                      |
| 11     | 1   | 11                 | 114.5687   | 1876.7369                      |
| 12     | 1   | 12                 | 113.8803   | 1874.2865                      |
| 13     | 1   | 13                 | 113.2000   | 1852.2329                      |
| 14     | 1   | 14                 | 112.5277   | 1830.4515                      |
| 1      | 2   | 1                  | 126.1204   | 0.0000                         |
| 2      | 2   | 2                  | 125.2531   | 2361.3723                      |
| 3      | 2   | 3                  | 124.4006   | 2321.0768                      |
| 4      | 2   | 4                  | 123.5660   | 2272.3410                      |
| 5      | 2   | 5                  | 122.7412   | 2245.6588                      |
| 6      | 2   | 6                  | 121.9244   | 2223.8774                      |
| 7      | 2   | 7                  | 121.1151   | 2203.4574                      |
| 8      | 2   | 8                  | 120.3125   | 2185.2155                      |
| 9      | 2   | 9                  | 119.5163   | 2167.7904                      |
| 10     | 2   | 10                 | 118.7322   | 2134.8461                      |
| 11     | 2   | 11                 | 117.9398   | 2157.4443                      |
| 12     | 2   | 12                 | 117.1611   | 2120.1437                      |
| 13     | 2   | 13                 | 116.3883   | 2104.0799                      |

**Table S4.** Primers used for RT-PCR

| <b>Gene</b>    | <b>Primer sequence (5' —3')</b>                                      |
|----------------|----------------------------------------------------------------------|
| IL-1 $\beta$   | Forward: GAAATGCCACCTTTTGACAGTG<br>Reverse: TGGATGCTCTCATCAGGACAG    |
| TNF- $\alpha$  | Forward: CCCTCACACTCAGATCATCTTCT<br>Reverse: GCTACGACGTGGGCTACAG     |
| INF- $\gamma$  | Forward: ATGAACGCTACACACTGCATC<br>Reverse: CCATCCTTTTGCCAGTTCCTC     |
| IL-6           | Forward: TAGTCCTTCCTACCCCAATTTCC<br>Reverse: TTGGTCCTTAGCCACTCCTTC   |
| IL-10          | Forward: CTTACTGACTGGCATGAGGATCA<br>Reverse: GCAGCTCTAGGAGCATGTGG    |
| TGF- $\beta$   | Forward: CTCCCGTGGCTTCTAGTGC<br>Reverse: GCCTTAGTTTTGGACAGGATCTG     |
| COL1A1         | Forward: GTGCGATGACGTGATCTGTGA<br>Reverse: CGGTGGTTTCTTGGTCGGT       |
| Fibronectin1   | Forward: GAGAATAAGCTGTACCATCGCAA<br>Reverse: CGACCACATAGGAAGTCCCAG   |
| VEGF           | Forward: GCACATAGAGAGAATGAGCTTCC<br>Reverse: CTCCGCTCTGAACAAGGCT     |
| $\beta$ -actin | Forward: ACATCCGTAAAGACCTCTATGCC<br>Reverse: ACCGATCCACACAGAGTACTTGC |
